# Supplementary material for: High‐intensity exercise in hypoxia improves endothelial function via increased nitric oxide bioavailability in C57BL/6 mice
Source: PubMed Central journal article supplement (PMC8518730; doi:10.1111/apha.13700), 2021-06-19

**(A)**

Interaction = 0.3900  
 Exercise intensity = 0.0210  
 O<sub>2</sub> level = 0.0820

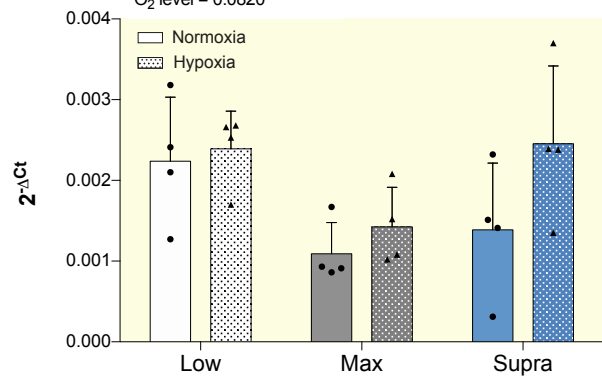**(B)**

Interaction = 0.8429  
 Exercise intensity = 0.2093  
 O<sub>2</sub> level = 0.4779

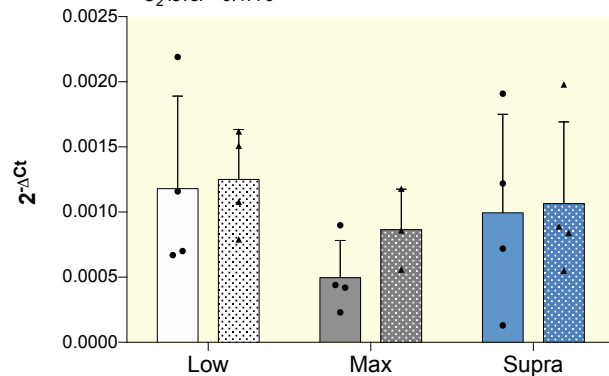**(C)**

Interaction = 0.0353  
 Exercise intensity = 0.3491  
 O<sub>2</sub> level = 0.8717

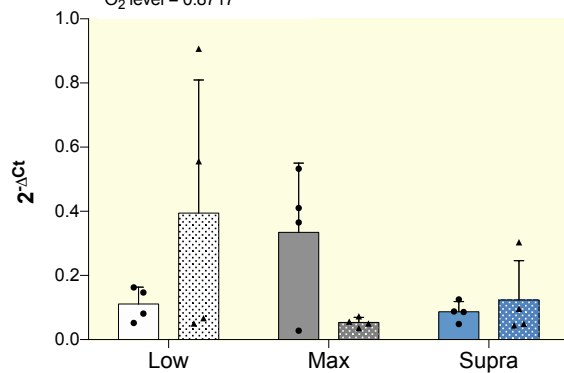

Supplement: APHA-233-e13700-s002.pdf [file APHA-233-e13700-s002.pdf]
