# Supplementary material for: High‐intensity exercise in hypoxia improves endothelial function via increased nitric oxide bioavailability in C57BL/6 mice
Source: PubMed Central journal article supplement (PMC8518730; doi:10.1111/apha.13700), 2021-06-19

Interaction = 0.0631  
Exercise intensity = 0.5941  
O<sub>2</sub> level = 0.9830

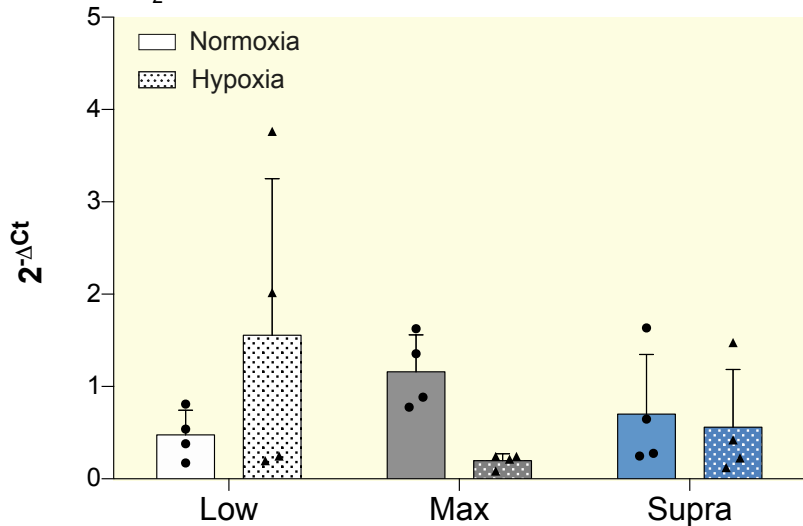

Supplement: APHA-233-e13700-s003.pdf [file APHA-233-e13700-s003.pdf]
